# Supplementary material
Source: Research Square preprint supplement (doi:10.21203/rs.3.rs-9269266/v1)
Supplement: Supplementary file 1 [file a0ed3db4abd315c3f24f487f.docx]

**Structural and evolutionary analysis of of non-specific lipid transfer proteins (nsLTPs) in *Cereus* (Cactaceae)**

Cardoso, M.I.O1, Teodoro, J.A.1, Costa-Silva, T.A.1, Amaral, D.T.1,*

1Centro de Ciências Naturais e Humanas, Universidade Federal do ABC (UFABC), Santo André, São Paulo, Brazil.

*Corresponding author. Avenida dos Estados, 5001, bloco A, Lab. 504-3, Santo André, 09210-580, Brazil. E-mail address: [danilo.trabuco@ufabc.edu.br](mailto:danilo.trabuco@ufabc.edu.br)


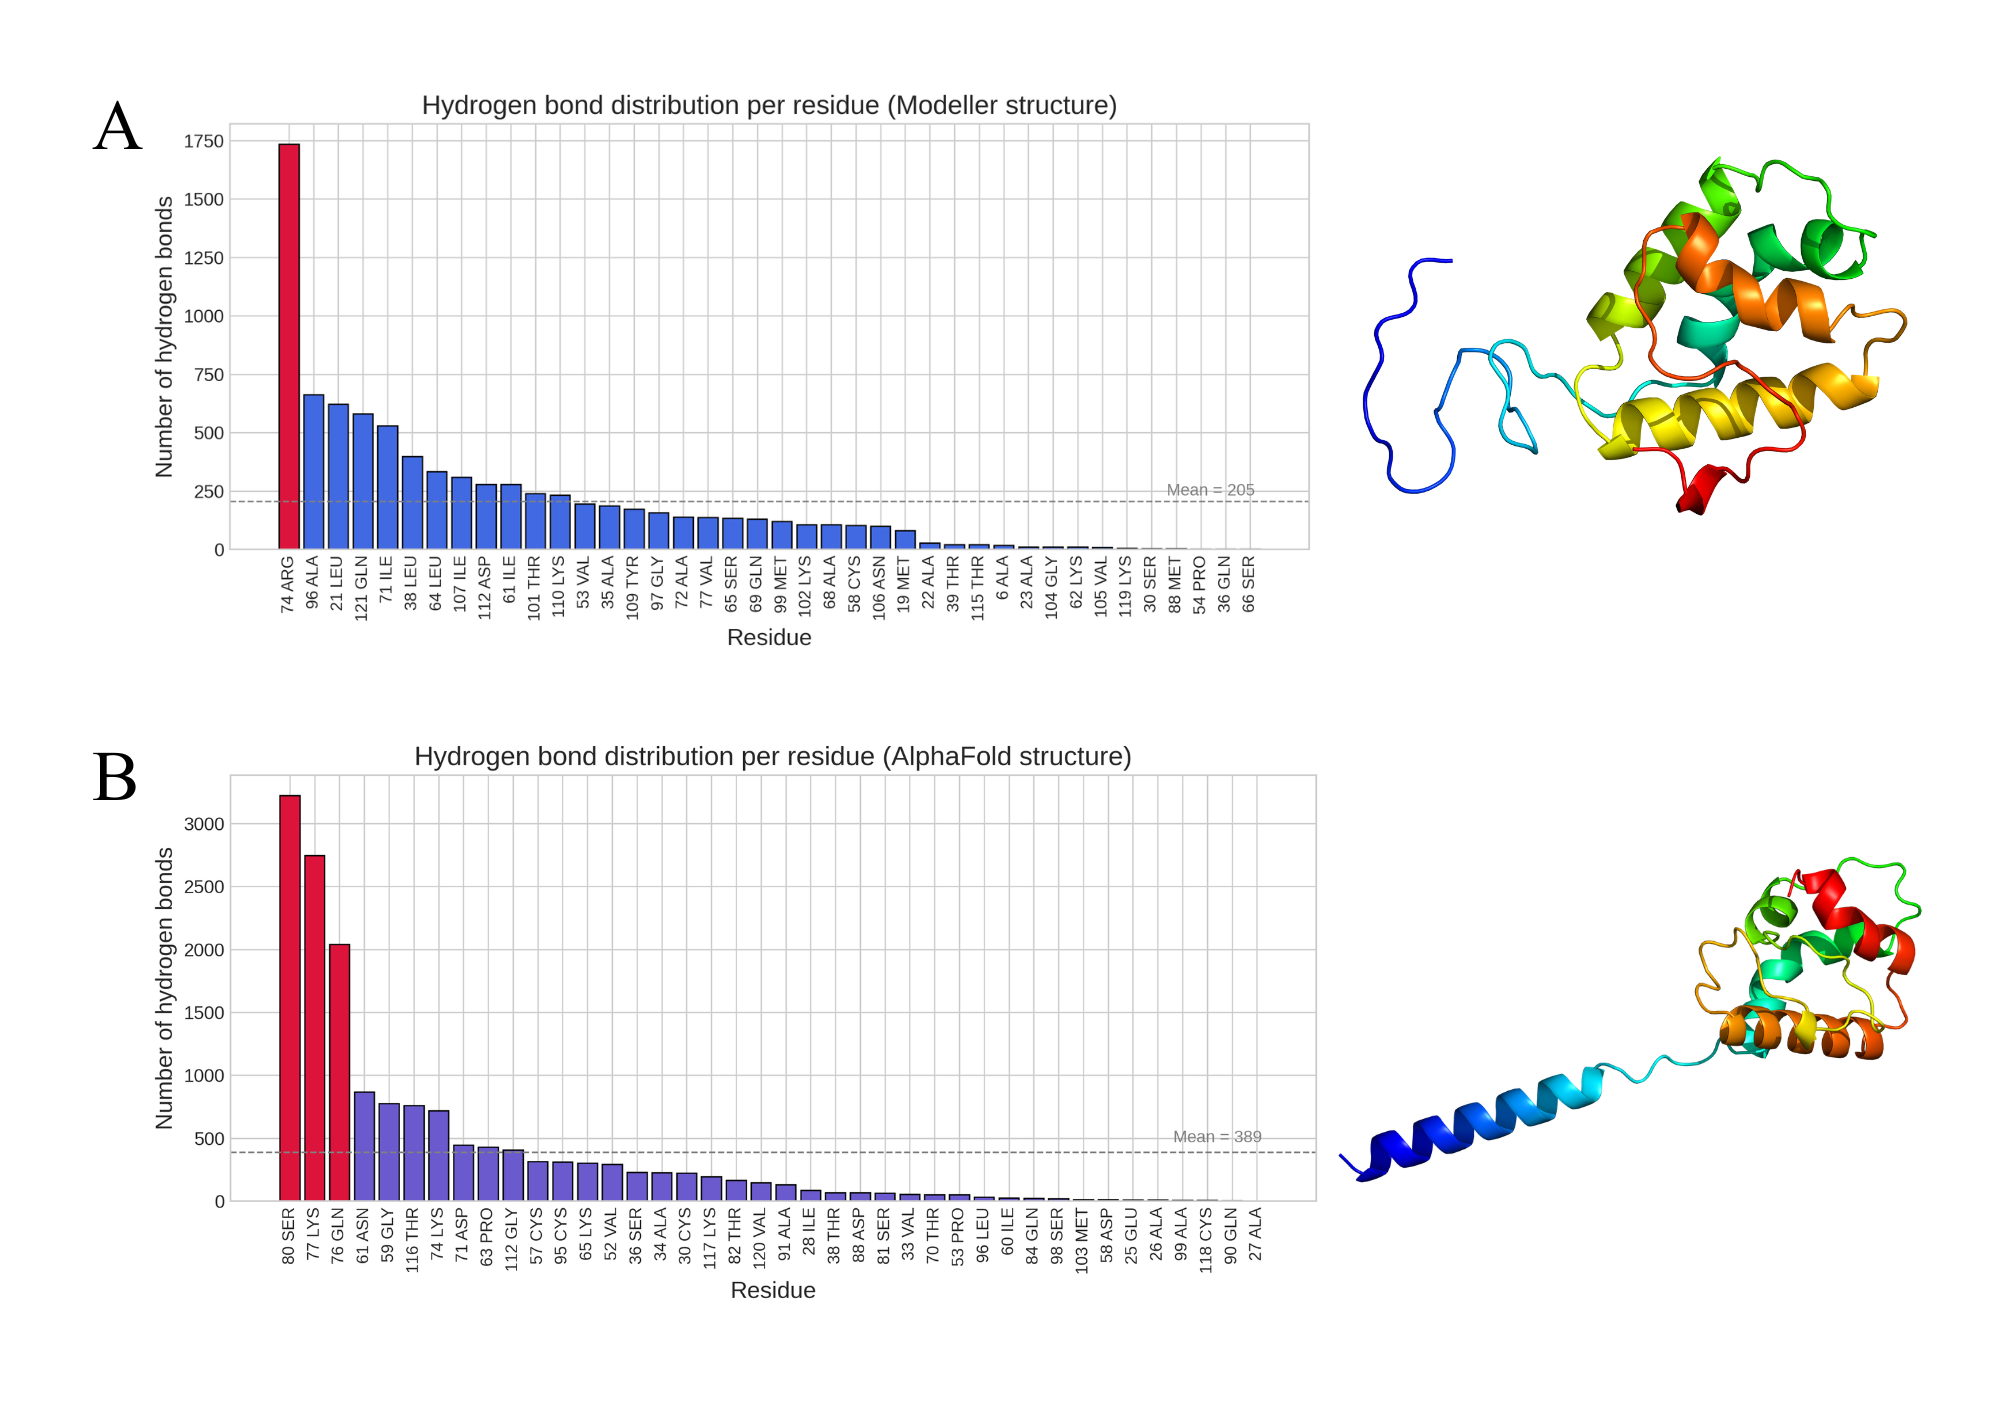


**Figure S1. Hydrogen bond interactions predicted by FTMAP in the protein structures.** (A) Table of H-bond interactions for the structure predicted by MODELLER. (B) Table of H-bond interactions for the structure predicted by AlphaFold. Residues forming hydrogen bonds and their interaction frequencies are indicated, highlighting the most probable binding sites.

**Table S1.** Main features of the probes used in FTSite and FTMap.

| **Molecule** | **ID** | **Physicochemical characteristics** | | | **Structure** |
| --- | --- | --- | --- | --- | --- |
| **Functional Group** | **Polarity** | **H-binding capacity** |
| Acetamide | ACD | Amide | Polar | Donor and acceptor | 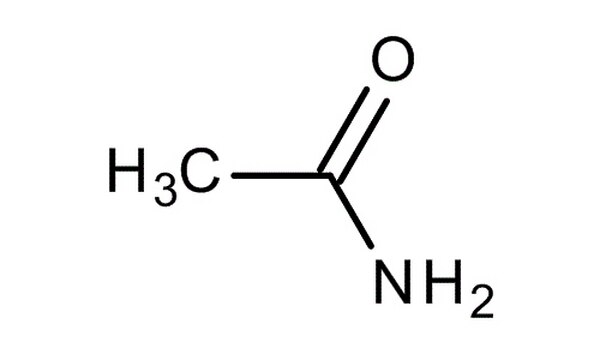 |
| Acetonitrile | ACN | Nitrile | Polar | Acceptor | 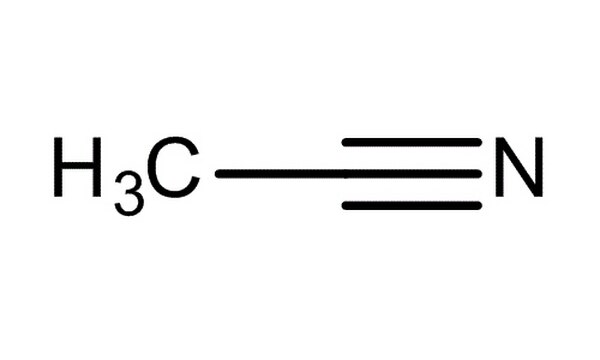 |
| Acetone | ACT | Ketone | Polar | Acceptor | 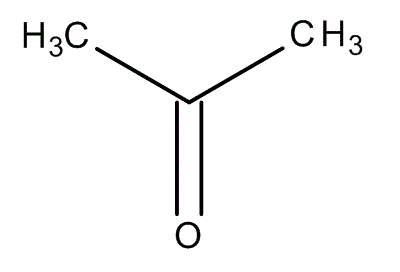 |
| Acetaldehyde | ADY | Aldehyde | Polar | Acceptor | 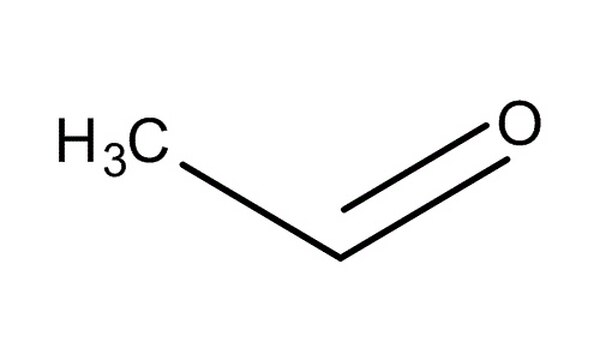 |
| Methylamine | AMN | Primary amine | Polar | Donor and acceptor | 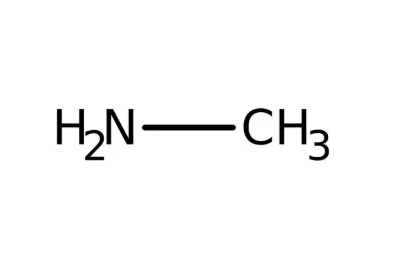 |
| Benzaldehyde | BDY | Aromatic aldehyde | Polar | Acceptor | 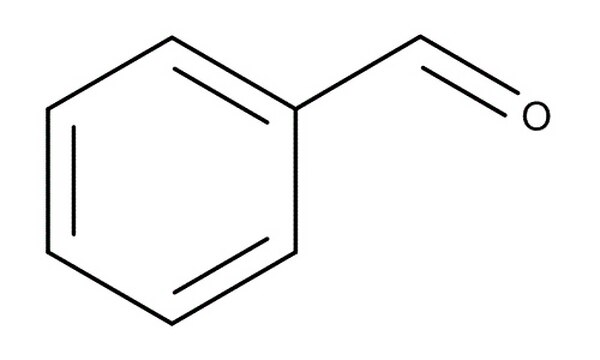 |
| Benzene | BEN | Aromatic | Nonpolar | None | 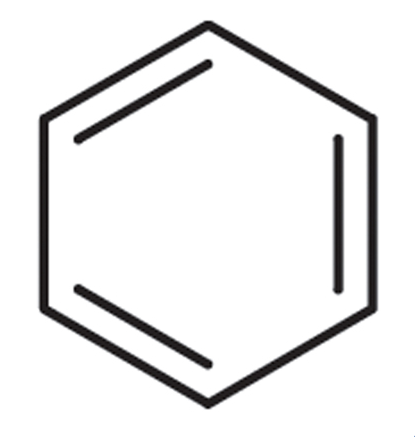 |
| Isobutanol | BUT | Alcohol | Polar | Donor and acceptor | 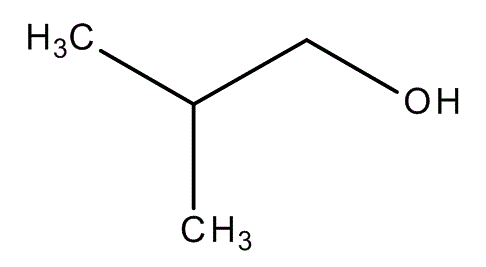 |
| Cyclohexane | CHX | Alkane | Nonpolar | None | 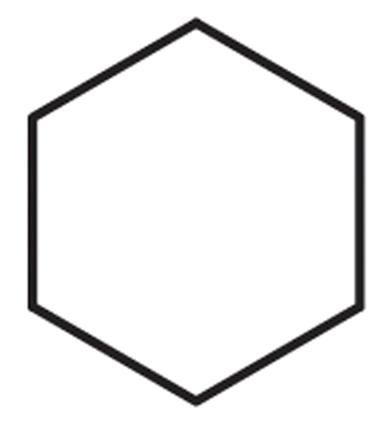 |
| N,N-dimethylformamide | DFO | Tertiary amide | Polar | Acceptor | 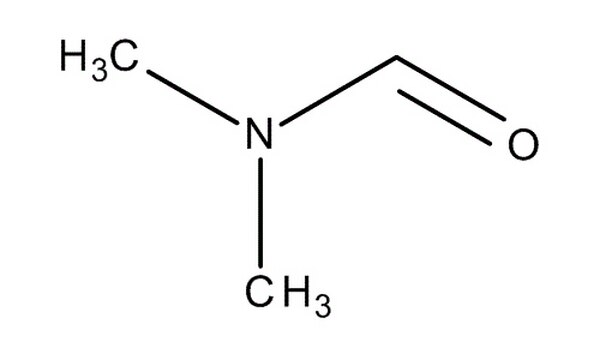 |
| Dimethyl ether | DME | Ether | Slightly polar | Acceptor | 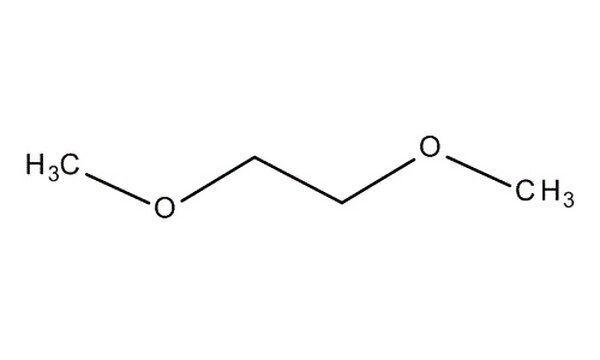 |
| Ethanol | EOL | Alcohol | Polar | Donor and acceptor | 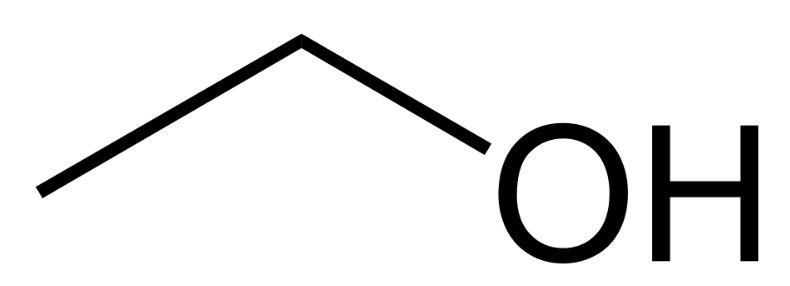 |
| Ethane | ETH | Alkane | Nonpolar | None | 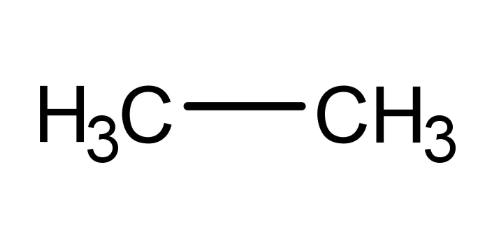 |
| Phenol | PHN | Aromatic alcohol | Polar | Donor and acceptor | 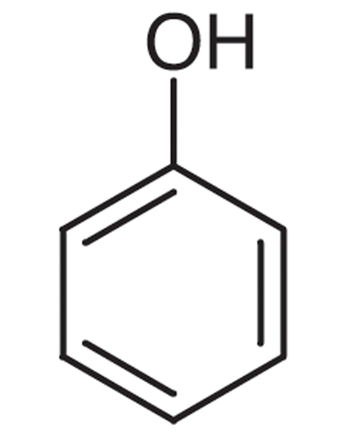 |
| Isopropanol | THS | Secondary alcohol | Polar | Donor and acceptor | 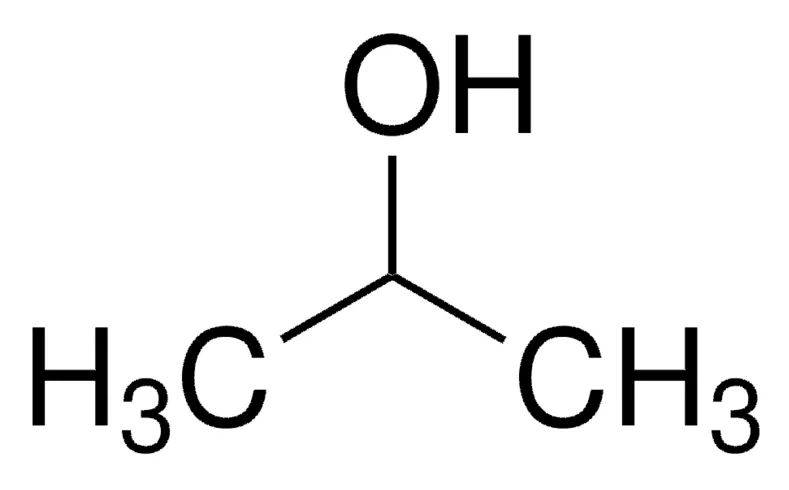 |
| Urea | URE | Amide | Polar | Donor and acceptor | 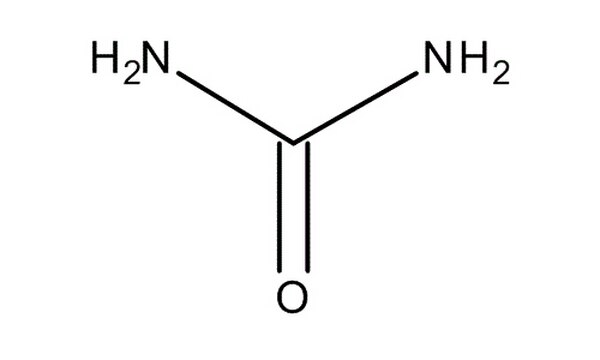 |

**Table S2. Codon sites tested for episodic diversifying selection using MEME.** Episodic diversifying selection was assessed using MEME implemented in Datamonkey. Sites with p ≤ 0.1 are shown.

| **Codon** | **α** | **β⁺ (positive class)** | **LRT** | **p-value** | **Branches** |
| --- | --- | --- | --- | --- | --- |
| 2 | 1.007 | 1787.64 | 22.13 | 0.0099 | 2 |
| 9 | 0.001 | 31.60 | 9.39 | 0.0099 | 0 |
| 20 | 2.130 | 109.82 | 5.99 | 0.0297 | 0 |
| 34 | 0.817 | 293.78 | 3.55 | 0.0396 | 1 |
| 88 | 0.000 | 7.48 | 5.94 | 0.0198 | 1 |
| 100 | 1.206 | 74.05 | 7.44 | 0.0099 | 1 |
| 112 | 4.552 | 24.98 | 7.15 | 0.0495 | 1 |
| 131 | 0.000 | 43619.53 | 10.09 | 0.0099 | 1 |
| 132 | 2.886 | 9373.63 | 73.80 | 0.0099 | 3 |
